# Supplementary material for: Hand-Carried Ultrasonography Instrumentation in the Diagnosis of Temporomandibular Joint Dysfunction
Source: MDPI journal article supplement (doi:10.3390/mps4040081), 2021-11-06
Supplement: s1 [file s1]

## Article

# Hand-carried ultrasonography instrumentation in the diagnosis of temporomandibular joint dysfunction.

Marco Severino <sup>1</sup>, Silvia Caruso<sup>1</sup>, Sofia Rastelli <sup>1</sup>, Roberto Gatto <sup>1</sup>, Tommaso Cutilli <sup>1</sup>, Laura Pittari<sup>2</sup>, Alessandro Nota<sup>2</sup>, and Simona Tecco <sup>2,\*</sup>

**Table S1.** Demographic and diagnostic data of the subjects included in the sample.

| Patient | Gender | Age | Side  | Click | Roar | Helkimo index * |
|---------|--------|-----|-------|-------|------|-----------------|
| 1       | M      | 38  | left  | -     | +    | II              |
| 2       | F      | 19  | left  | +     | -    | II              |
| 3       | F      | 26  | right | +     | -    | II              |
| 4       | F      | 32  | left  | -     | +    | II              |
| 5       | M      | 43  | left  | +     | +    | II              |
| 6       | M      | 31  | right | -     | +    | II              |
| 7       | F      | 28  | right | -     | +    | II              |
| 8       | M      | 36  | left  | +     | -    | II              |
| 9       | F      | 33  | right | -     | +    | II              |
| 10      | F      | 57  | left  | +     | +    | III             |
| 11      | M      | 49  | left  | +     | +    | III             |
| 12      | F      | 24  | right | +     | -    | I               |
| 13      | F      | 37  | right | +     | -    | II              |
| 14      | F      | 46  | right | +     | -    | III             |
| 15      | M      | 39  | left  | -     | +    | II              |
| 16      | M      | 29  | right | +     | -    | I               |
| 17      | F      | 33  | left  | +     | -    | I               |
| 18      | F      | 38  | right | -     | +    | II              |
| 19      | F      | 44  | right | -     | +    | II              |
| 20      | M      | 52  | left  | +     | +    | III             |
| 21      | M      | 31  | left  | -     | +    | II              |
| 22      | F      | 35  | left  | +     | -    | II              |
| 23      | M      | 42  | right | -     | +    | II              |
| 24      | M      | 46  | left  | +     | +    | I               |
| 25      | F      | 39  | right | -     | +    | II              |
| 26      | M      | 30  | right | -     | +    | II              |

|    |   |    |       |   |   |    |
|----|---|----|-------|---|---|----|
| 27 | M | 29 | left  | + | - | I  |
| 28 | F | 41 | right | - | + | II |

\* Helkimo index includes three sub-indices (anamnesis, dysfunction, and occlusal index) to evaluate TMJ dysfunction. The anamnesis index differentiates the patient into 3 levels (absent, medium, and severe symptoms) based on the symptoms of dysfunction reported during an interview. The dysfunction index differentiates the patient into 4 levels (absent, medium, moderate, and severe dysfunction) based on a functional evaluation of the mandibular range of motion, impairment, and pain on palpation or during movement. Its scoring range is from 0 to 25. The occlusal index differentiates the patient into 3 levels (absent, moderate, and severe occlusal disorders) based on the analysis of individual occlusion.

The Helkimo index differentiated the patient into 3 levels, that are Helkimo I = mild signs or symptoms, Helkimo II = moderate symptoms, and Helkimo III = severe symptoms.
